1 **The BinaxNOW antigen detection assay on CSF samples for diagnosis of pneumococcal**  
2 **meningitis**

3 Short title: BinaxNOW test for pneumococcal meningitis

4 Sreeram Chandra Murthy Peela 1¶, Sujatha Sistla 1¶ \*

5 1 Department of Microbiology, Jawaharlal Institute of Postgraduate Medical Education &  
6 Research (JIPMER), Dhanvantri Nagar, Gorimedu, Puducherry – 605006, India

7 \*Corresponding author

8 Email: [sujathasistla@gmail.com](mailto:sujathasistla@gmail.com)

9 ¶These authors contributed equally to this work

10

11 **The BinaxNOW antigen detection assay on CSF samples for diagnosis of pneumococcal**  
12 **meningitis**

13 **Abstract:**

14 **Introduction:**

15 The BinaxNOW pneumococcal antigen detection assay is an immuno-chromatographic  
16 technique where the cell wall polysaccharide instead of capsular polysaccharide is the target.  
17 Although intended for use on urine samples, its role in diagnosis of pneumococcal meningitis  
18 has been reported by many others. The current study explores its accuracy when compared  
19 with real-time PCR.

20 **Methodology:**

21 CSF samples from suspected meningitis cases were processed for Gram stain and culture  
22 following standard protocols. Antigen was detected by BinaxNOW antigen detection assay  
23 for *Streptococcus pneumoniae*. Previously published primers and protocols were used for  
24 real-time PCR targeting autolysin (*lytA*) gene and was considered as the gold standard test.

25 **Results:**

26 Among the 74 samples tested, pneumococcal antigen was detected in 21.6% (16/74) and  
27 qPCR in 11 (14.9%) samples. Antigen detection assay had higher sensitivity (90.9%) when  
28 compared with culture (45.5%) while the positive predictive value was the lowest (62.5% and  
29 100% for culture). It was in substantial agreement with the gold standard test with kappa  
30 coefficient of 0.685 and an accuracy of 90.5%.

31 **Conclusions:**

32 The BinaxNOW pneumococcal antigen detection test can be employed for initial screening of  
33 samples or point-of-care test owing to its substantial agreement with real-time PCR.

34 **Keywords:** BinaxNOW test; Pneumococcal meningitis; antigen detection

35 **Introduction:**

36 Acute pyogenic meningitis remains a major cause of morbidity and mortality in children and  
37 adults and *Streptococcus pneumoniae* is one of the three predominant etiological agents [1].  
38 Up to 70000 deaths per year of acute bacterial meningitis were reported to be due to this  
39 organism alone in developing countries [2]. Despite its medical importance and high  
40 prevalence, diagnosis of pneumococcal meningitis may be hampered by many factors like  
41 prior antibiotic administration and time lapse before the sample is processed [3]. In  
42 developing countries like India, where over the counter availability of antibiotics is very  
43 common, it poses a challenge to the treating physician and the microbiologist to establish the  
44 etiology of acute bacterial meningitis. These difficulties were partially resolved when  
45 antigen-based assays (like latex agglutination tests or immuno-chromatographic tests) and  
46 molecular assays like PCR and real-time PCR were introduced into laboratory diagnosis. The  
47 latex agglutination tests although are rapid, they require additional equipment which may  
48 hinder their use as a point-of-care test or in resource-poor settings [3].

49 The BinaxNOW pneumococcal urinary antigen test is a lateral flow immuno-  
50 chromatographic test where the cell wall polysaccharide is the target instead of the capsular  
51 polysaccharide as in many latex agglutination tests. This polysaccharide is known to be  
52 similar among various pneumococcal serotypes, and hence is not influenced the serotype that  
53 may have caused the disease [4–7]. The assay requires minimal sample volume and expertise  
54 and the results can be visualised within 15 minutes. Originally it was devised to test the  
55 presence of pneumococcal antigen in urine samples of patients suspected with pneumococcal  
56 pneumonia. However, a few studies extended its use for diagnosis of pneumococcal  
57 meningitis and the test has been approved by the United States Food and Drug  
58 Administration for diagnosis of pneumococcal meningitis [3]. One advantage of this shift in  
59 testing is that the CSF samples do-not contain the antigen while a person is pneumococcal

60 carrier (antigen test can be positive even among asymptomatic carriers). Thereby this assay  
61 can reflect the true pathological state and avoid any unintended false positives.

62 This prospective study was thus undertaken to assess the accuracy of the BinaxNOW antigen  
63 detection assay in comparison with real-time PCR (qPCR) for diagnosing pneumococcal  
64 meningitis. This is the second study reported from India and conducted on all age groups  
65 rather than children alone as in many other studies.

## 66 **Materials and methods:**

67 The study was conducted from June 2015 to September 2018 at a tertiary care center in  
68 southern India. The study was approved by Institute Human Ethics committee and written  
69 informed consent/assent was obtained from all study participants. CSF samples were  
70 collected from patients belonging to all age groups and clinically suspected with acute  
71 meningitis (Appendix S1). All the samples were processed for Gram stain and culture  
72 following standard procedures.

73 **Antigen detection:** Samples were tested for pneumococcal antigen using BinaxNOW  
74 *Streptococcus pneumoniae* Antigen Card (previously Alere, Massachusetts, USA) following  
75 manufacturer instructions for performance and interpretation. A total of 35 isolates belonging  
76 to other bacterial species (*Haemophilus influenzae*, *Klebsiella pneumoniae*, *Streptococcus*  
77 *pyogenes*, *Staphylococcus aureus*, *Enterococcus faecalis*, *Enterococcus faecium* and  
78 *Escherichia coli*) and 10 pneumococcal isolates were initially tested for cross-reactivity and  
79 positivity.

80 **DNA extraction and qPCR:** Around 180 µL of the sample was used for DNA extraction  
81 with QIAMP DNA Blood Mini kit (Qiagen, Hilden, Germany) following manufacturer  
82 protocol for Gram-positive bacteria. Real-time PCR (qPCR) targeting autolysin (*lytA*) gene  
83 was employed for detection of pneumococci in the clinical samples using previously

84 published primers and probe (Appendix S2) [8]. Any sample with  $C_T$  value  $\leq 40$  was  
85 considered as positive.

86 **Statistical analyses:** The results of each test were expressed as percentages. Any sample  
87 positive by qPCR was considered as true positive. The sensitivity, specificity, positive and  
88 negative predictive values and diagnostic accuracy of culture and antigen assay in  
89 comparison with qPCR were calculated. The degree of agreement between gold standard test  
90 and other assays was estimated using Cohen's kappa coefficient. All statistical analyses were  
91 performed in OpenEpi v3.01.

92 **Results:**

93 A total of 74 samples were collected during the study period among which 26 (35.1%) were  
94 females. Around 35.1% (26/74) of the subjects were children aged less than five years and  
95 6.8% (5/74) were adults aged 60 or more years. Among the 74 subjects, qPCR was positive in  
96 11 (14.9%) while pneumococcus was isolated from five (6.8%) patients (table 1). Four  
97 (5.4%) samples Gram stain had features suggestive of pneumococcal infection. The median  
98  $C_T$  values were higher among the culture negative patients (33.13 vs. 28.76 among culture  
99 positive patients) (table 1).

100 The BinaxNOW test was positive when tested on all pneumococcal isolates, and negative for  
101 all other bacterial species except for one isolate of *E. faecalis*. When tested on CSF  
102 specimens, the test result was obtained in 15 minutes, and 16 (21.6%) samples were positive.  
103 Only one sample among the qPCR positive samples was negative while 6 samples negative  
104 by qPCR were positive by the antigen test. When compared with culture, the diagnostic  
105 accuracy was slightly low (91.9% for culture and 90.5% by antigen test) while sensitivity was  
106 higher (90.9% vs. 45.5% by culture) (table 1). The antigen test had substantial agreement  
107 with qPCR (Cohen's kappa=0.685) and accuracy of 90.5% (table 1).

108 Table 1: Results of culture and antigen tests when compared with qPCR

| Results                     | Culture positive       | Culture negative        | BinaxNOW positive       | BinaxNOW negative    |
|-----------------------------|------------------------|-------------------------|-------------------------|----------------------|
| qPCR positive               | 5 (6.8 %) <sup>#</sup> | 6 (8.1%) <sup>#</sup>   | 10 (13.5%) <sup>#</sup> | 1(1.4%) <sup>#</sup> |
| qPCR negative               | 0                      | 63 (85.1%) <sup>#</sup> | 6 (8.1%) <sup>#</sup>   | 57(77%) <sup>#</sup> |
| C <sub>T</sub> <sup>^</sup> | 28.8 (25,29)           | 33.1 (32,34.5)          | 31.2 (26.9,33.5)        | 35*                  |
| Sensitivity <sup>@</sup>    | 45.5 (21.3, 72)        |                         | 90.9 (62.3, 98.4)       |                      |
| Specificity <sup>@</sup>    | 100 (94.3, 100)        |                         | 90.5 (80.7, 95.6)       |                      |
| PPV <sup>@</sup>            | 100 (56.6, 100)        |                         | 62.5 (38.6, 81.5)       |                      |
| NPV <sup>@</sup>            | 91.3 (82.3, 96)        |                         | 98.3 (90.9, 99.7)       |                      |
| Cohen's kappa <sup>@</sup>  | 0.587 (0.379 - 0.794)  |                         | 0.685(0.463-0.907)      |                      |
| Accuracy <sup>@</sup>       | 91.9 (83.4, 96.2)      |                         | 90.5 (81.7, 95.3)       |                      |

109 \*Only one sample was antigen negative and qPCR positive; <sup>#</sup>Percentages were calculated  
 110 against the total number of patients (N=74); <sup>@</sup> Estimates with 95% confidence intervals in  
 111 parentheses; PPV – positive predictive value; NPV – negative predictive value; <sup>^</sup>median and  
 112 interquartile ranges

113 **Discussion:**

114 The triad of bacteria, *Streptococcus pneumoniae*, *Hemophilus influenzae* and *Neisseria*  
 115 *meningitis*, are believed to be the most common pathogens causing acute pyogenic meningitis  
 116 in all age groups. Etiologic diagnosis of acute pyogenic meningitis is always a challenge, as  
 117 conventional microbiological techniques like Gram stain and culture are known to have poor  
 118 sensitivity [9–11]. This poor sensitivity is further complicated by the antibiotic administration  
 119 before sample collection. To aid in diagnosis of acute bacterial meningitis, we previously

120 employed the latex agglutination test (Directigen™ Meningitis Combo Test Kit, Becton  
121 Dickinson, USA) on CSF samples. The assay had a sensitivity of 80% when compared with  
122 multiplex PCR where pneumolysin was the gene targeted. The assay required about 15  
123 minutes with pre-heating steps and other equipment like centrifuge, pipettes and rotator.  
124 These requirements hindered its use as a point-of-care or a rapid test.

125 Antigen detection was performed using BinaxNOW antigen detection method. This is a  
126 lateral flow, immuno-chromatographic assay and detects cell wall antigen, and hence covers  
127 all the serotypes of *S. pneumoniae*. The test is rapid, simple to perform and does not require  
128 specialized equipment or training. As per the kit insert, the detection of pneumococcal  
129 antigen is maximum (>90% positive) when the number of bacterial cells is above  $3 \times 10^4$   
130 cells/ml, and falls to 44% when the bacterial cell count is  $<1.5 \times 10^4$  cells/ml. It was also  
131 mentioned that the kit had 97% specificity and 99% sensitivity. Therefore its use in the  
132 clinical diagnosis of pneumococcal meningitis has been evaluated in a few studies.

133 We found the test to have higher sensitivity (90.9%) but lower predictive value (62.5%) when  
134 compared with culture. In a recent multicentric study from India, 2081 CSF specimens from  
135 children suspected with bacterial meningitis were tested and highlighted the four-fold  
136 improvement in detection of pneumococcal meningitis by BinaxNOW assay (6.1% were  
137 positive by BinaxNOW test while only 1.5% by culture) [3]. When compared with culture, it  
138 had a low positive predictive value (25.6%) but had 100% sensitivity and negative predictive  
139 values. Improving on this study, we assessed the use of BinaxNOW test by comparing with  
140 qPCR, and found similar sensitivity and negative predictive values (90.9% and 98.3%  
141 respectively). Similar high rates of positivity were detected in an international study, and  
142 19.3% were positive by culture/BinaxNOW while only 6.3% by culture/latex agglutination or  
143 1.1% by culture alone among the Asian countries [12]. Meta-analysis by the WHO meningitis  
144 group assessed its diagnostic accuracy and found sensitivity and specificity ranging 96-100%

145 and 95-97% respectively [3]. In a study by Picazo et al, when compared with culture or qPCR  
146 targeting autolysin gene, the sensitivity and specificity were 88% and 72.5% but both CSF  
147 and pleural fluid were tested [13].

148 Improving the diagnosis of pneumococcal meningitis in cases where antibiotic therapy has  
149 been initiated prior to CSF collection is one of the advantages of the BinaxNOW test. In a  
150 study by Brink et al, CSF culture was negative in all samples where antibiotic treatment  
151 preceded sample collection, while BinaxNOW assay was positive in 75% of the samples even  
152 after 10 days of therapy [14]. Similarly, in another study, the positivity by BinaxNOW test  
153 was significantly higher among patients with prior antibiotic therapy (24.2%) when compared  
154 with those without initiation of therapy (12.2%) [12]. Despite its advantages, some cross  
155 reactivity to other bacterial species has been noted. In a study on blood cultures, a weak  
156 positive reaction was identified when testing *E. faecium* and *E. faecalis* and positive results  
157 when testing *Streptococcus mitis* [15]. Similar to this, we found BinaxNOW positive for one  
158 *E. faecalis* isolate, but negative for all other pathogens tested.

159 The advantages of the BinaxNOW assay on CSF specimens *viz.* lack of requirement for  
160 special equipment or trained personnel, good sensitivity and specificity when compared with  
161 real-time PCR, probable indifference to prior antibiotic therapy and low turnaround time  
162 makes it a suitable method for point of care testing and especially useful in resource-limited  
163 settings. Some of the limitations of the present study are its low sample size and clinical  
164 details or histories of antibiotic therapy were not recorded.

#### 165 **Conclusions:**

166 The BinaxNOW antigen detection assay can be used as point-of-care test or screening test for  
167 diagnosis of pneumococcal meningitis owing to its high accuracy, sensitivity and substantial  
168 agreement with real-time PCR.



169 **References:**

- 170 1. Kennedy WA, Chang S-J, Purdy K, Le T, Kilgore PE, Kim JS, et al. Incidence of  
171 bacterial meningitis in Asia using enhanced CSF testing: polymerase chain reaction,  
172 latex agglutination and culture. *Epidemiol Infect.* 2007;135: 1217–1226.  
173 doi:10.1017/S0950268806007734
- 174 2. Obaro S, Adegbola R. The pneumococcus: carriage, disease and conjugate vaccines. *J*  
175 *Med Microbiol.* 2002;51: 98–104. doi:10.1099/0022-1317-51-2-98
- 176 3. Jayaraman Y, Mehendale S, Jayaraman R, Varghese R, Chethrapilly Purushothaman  
177 GK, Rajkumar P, et al. Immunochromatography in CSF improves data on surveillance  
178 of *S. pneumoniae* meningitis in India. *J Infect Public Health.* 2018;11: 735–738.  
179 doi:10.1016/j.jiph.2018.01.002
- 180 4. Petti CA, Woods CW, Reller LB. *Streptococcus pneumoniae* Antigen Test Using  
181 Positive Blood Culture Bottles as an Alternative Method To Diagnose Pneumococcal  
182 Bacteremia. *J Clin Microbiol.* 2005;43: 2510–2512. doi:10.1128/JCM.43.5.2510-  
183 2512.2005
- 184 5. Samra Z, Shmuely H, Nahum E, Paghis D, Ben-Ari J. Use of the NOW *Streptococcus*  
185 *pneumoniae* urinary antigen test in cerebrospinal fluid for rapid diagnosis of  
186 pneumococcal meningitis. *Diagn Microbiol Infect Dis.* 2003;45: 237–240.  
187 doi:10.1016/S0732-8893(02)00548-5
- 188 6. Sinclair A, Xie X, Teltscher M, Dendukuri N. Systematic Review and Meta-Analysis of  
189 a Urine-Based Pneumococcal Antigen Test for Diagnosis of Community-Acquired  
190 Pneumonia Caused by *Streptococcus pneumoniae*. *J Clin Microbiol.* 2013;51: 2303–  
191 2310. doi:10.1128/JCM.00137-13

- 192 7. Marcos MA, Martínez E, Almela M, Mensa J, de Anta MTJ. New rapid antigen test for  
193 diagnosis of pneumococcal meningitis. *The Lancet*. 2001;357: 1499–1500.  
194 doi:10.1016/S0140-6736(00)04658-4
- 195 8. Carvalho M da GS, Tondella ML, McCaustland K, Weidlich L, McGee L, Mayer LW,  
196 et al. Evaluation and improvement of real-time PCR assays targeting *lytA*, *ply*, and  
197 *psaA* genes for detection of pneumococcal DNA. *J Clin Microbiol*. 2007;45: 2460–  
198 2466. doi:10.1128/JCM.02498-06
- 199 9. Wu HM, Cordeiro SM, Harcourt BH, Carvalho M, Azevedo J, Oliveira TQ, et al.  
200 Accuracy of real-time PCR, Gram stain and culture for *Streptococcus pneumoniae*,  
201 *Neisseria meningitidis* and *Haemophilus influenzae* meningitis diagnosis. *BMC Infect*  
202 *Dis*. 2013;13: 26. doi:10.1186/1471-2334-13-26
- 203 10. Modi GB, Patel KD, Soni ST, Patel KJ, Mangukiya JD, Jain PS. Bacteriological Profile  
204 of Pyogenic Meningitis in Tertiary Care Hospital, Ahmedabad -. *Natl J Med Res*.  
205 2012;2: 313–317.
- 206 11. Seth R. Rapid and Accurate Diagnosis of Acute Pyogenic Meningitis Due to  
207 *Streptococcus pneumoniae*, *Haemophilus influenzae* Type b and *Neisseria meningitidis*  
208 Using A Multiplex PCR Assay. *J Clin Diagn Res*. 2017;11: FC01–FC04.  
209 doi:10.7860/JCDR/2017/28114.10532
- 210 12. Moïsi JC, Saha SK, Falade AG, Njanpop-Lafourcade B-M, Oundo J, Zaidi AKM, et al.  
211 Enhanced diagnosis of pneumococcal meningitis with use of the Binax NOW  
212 immunochromatographic test of *Streptococcus pneumoniae* antigen: a multisite study.  
213 *Clin Infect Dis*. 2009;48 Suppl 2: S49-56. doi:10.1086/596481

- 214 13. Picazo JJ, Contreras JR, Ríos E, Culebras E, Rodríguez-Avial I, Méndez C, et al. Rapid  
215 diagnosis of invasive pneumococcal disease in pediatric population. *J Microbiol*  
216 *Methods*. 2013;93: 116–120. doi:10.1016/j.mimet.2013.03.001
- 217 14. Brink M, Welinder-Olsson C, Hagberg L. Time window for positive cerebrospinal fluid  
218 broad-range bacterial PCR and *Streptococcus pneumoniae* immunochromatographic test  
219 in acute bacterial meningitis. *Infect Dis Lond Engl*. 2015;47: 869–877.  
220 doi:10.3109/23744235.2015.1078907
- 221 15. Tootla HD, Bamford C, Centner CM, Moodley C. The BinaxNOW pneumococcal  
222 antigen test: An adjunct for diagnosis of pneumococcal bacteraemia. *South Afr J Infect*  
223 *Dis*. 2021;36: 9. doi:10.4102/sajid.v36i1.244
- 224

225 **Supplementary Data**

226 **Appendix S1: Criteria for clinical diagnosis**

227 **Appendix S2: Protocols**

228 **Table S1: Cycle threshold values.** P – Positive, N- Negative.  $C_T$ – cycle threshold in qPCR;

229 Any sample with  $C_T > 35$  were retested (duplicates) and mean values are shown

230
